# Supplementary material
Source: publisher figshare collection journal article supplement (https://acs.figshare.com/ndownloader/files/8561095)

## Supporting Information

### Trichodermine, an Unique Polyketide-Hybrid with a Cyclopentone-Pyrone Skeleton from the Plant Endophytic Fungus *Trichoderma gamsii*

Lin Chen,<sup>†</sup> Shu-Bin Niu,<sup>‡</sup> Li Li,<sup>⊥</sup> Gang Ding,<sup>\*,†</sup> Meng Yu,<sup>†</sup> Gui-shan Zhang<sup>||</sup>,  
Meng-hua Wang,<sup>†</sup> Lu-ying Li,<sup>†</sup> Tao Zhang,<sup>†</sup> Hong-Mei Jia,<sup>†</sup> Hong-wu Zhang,<sup>†</sup> Hai  
Shang,<sup>†</sup> Xing-zhong Liu<sup>§</sup>, Zhong-mei Zou<sup>\*,†</sup>

|                                                                                     |   |
|-------------------------------------------------------------------------------------|---|
| Figure S1. <sup>1</sup> H-NMR of compound <b>1</b> .....                            | 2 |
| Figure S2. <sup>13</sup> C-NMR of compound <b>1</b> .....                           | 3 |
| Figure S3. HSQC spectrum of compound <b>1</b> .....                                 | 4 |
| Figure S4. <sup>1</sup> H- <sup>1</sup> H COSY spectrum of compound <b>1</b> ... .. | 5 |
| Figure S5. HMBC spectrum of compound <b>1</b> .....                                 | 6 |
| Figure S6. NOESY spectrum of compound <b>1</b> .....                                | 7 |
| Figure S7. HR-ESI-MS spectrum of compound <b>1</b> .....                            | 8 |
| Figure S8. CD spectrum of compound <b>1</b> .....                                   | 9 |

Figure S1.  $^1\text{H}$  NMR spectrum of Compound 1 (DMSO- $d_6$ , 600MHz).

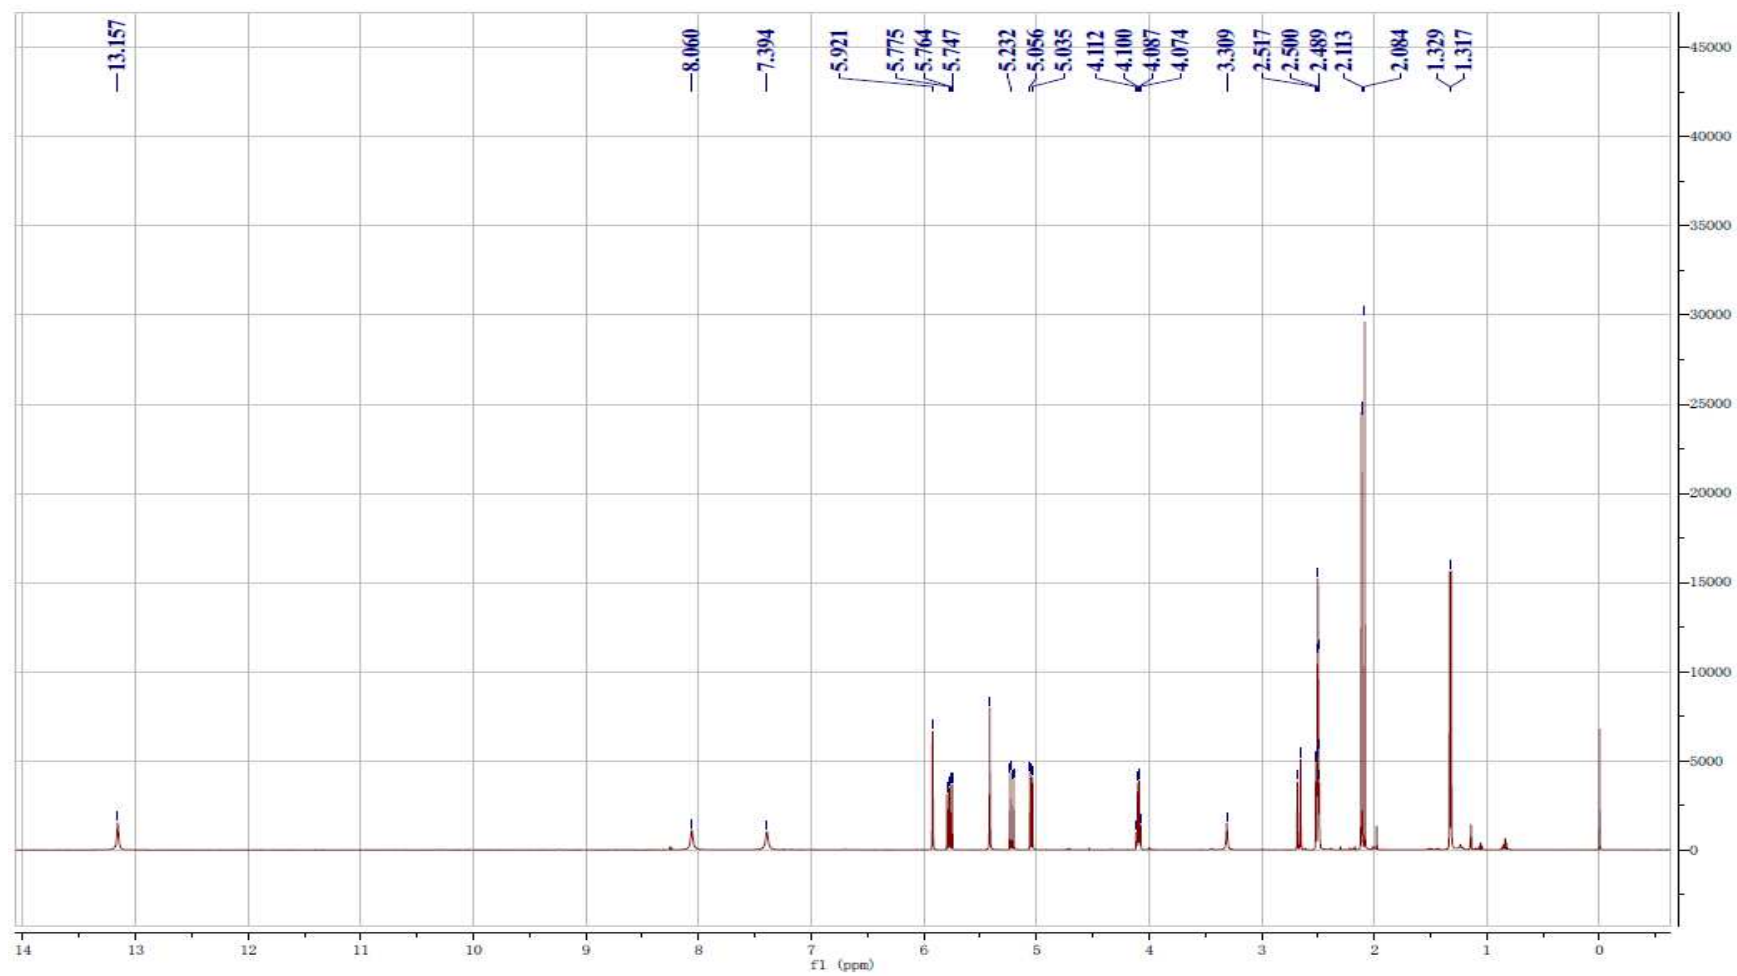

Figure S2.  $^{13}\text{C}$  NMR spectrum of Compound 1 (DMSO- $d_6$ , 150MHz).

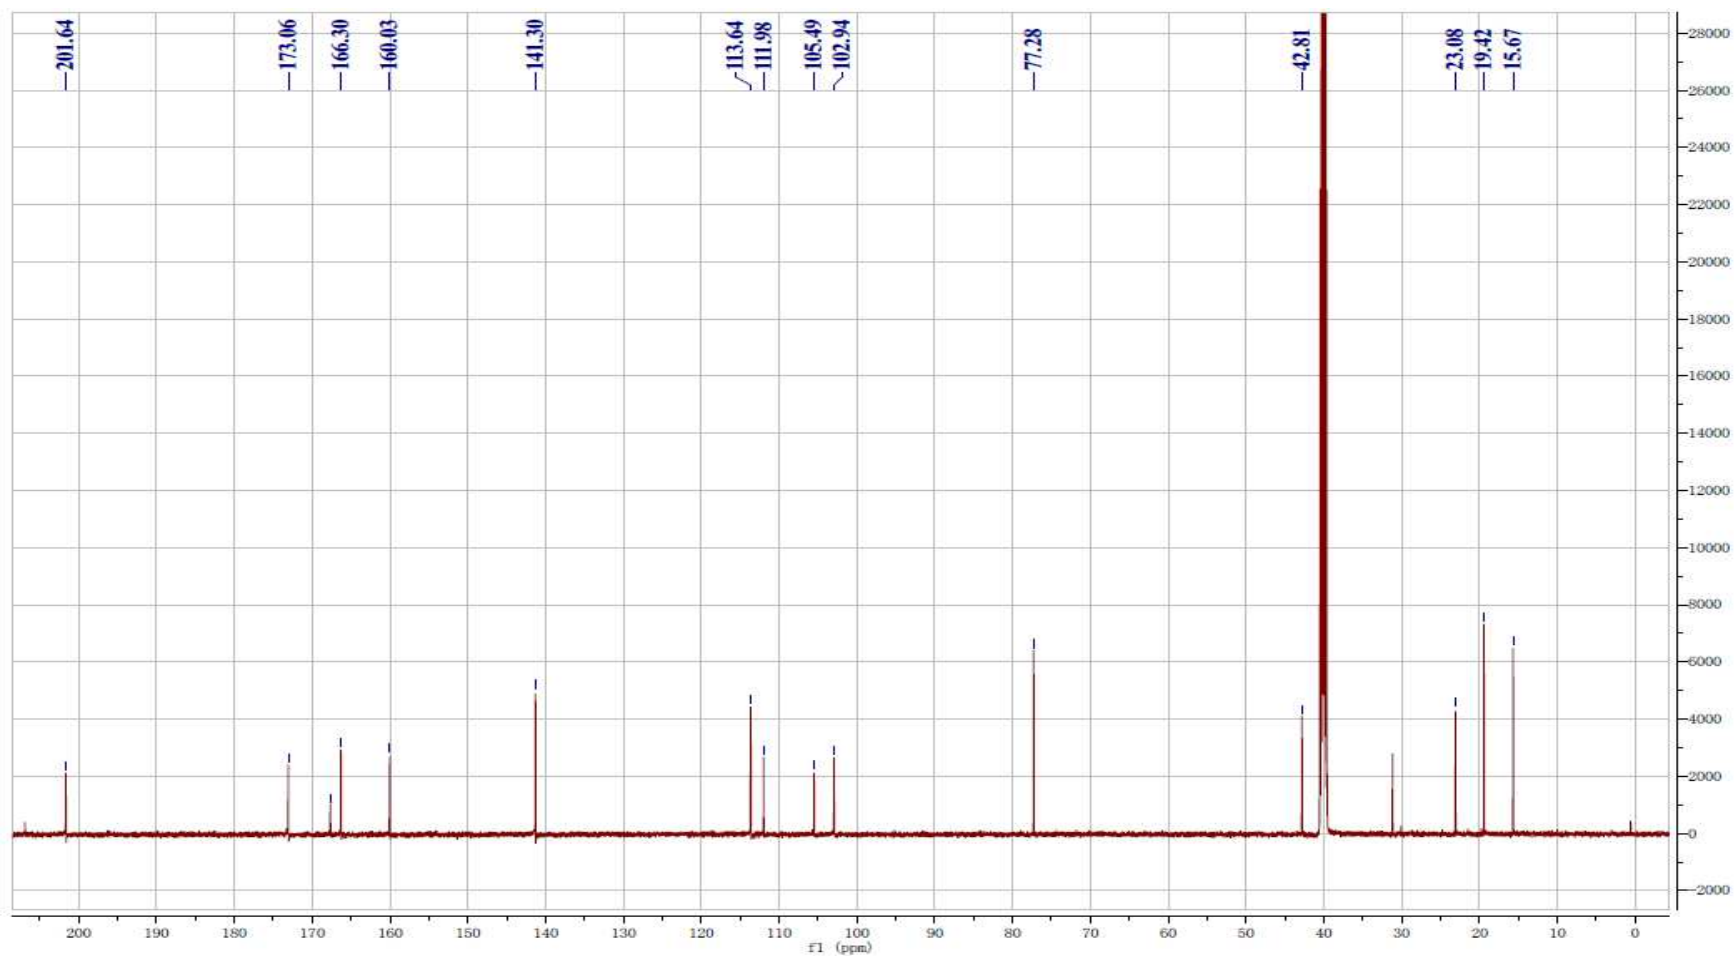

Figure S3. HSQC spectrum of Compound 1 (DMSO-*d*<sub>6</sub>, 600MHz).

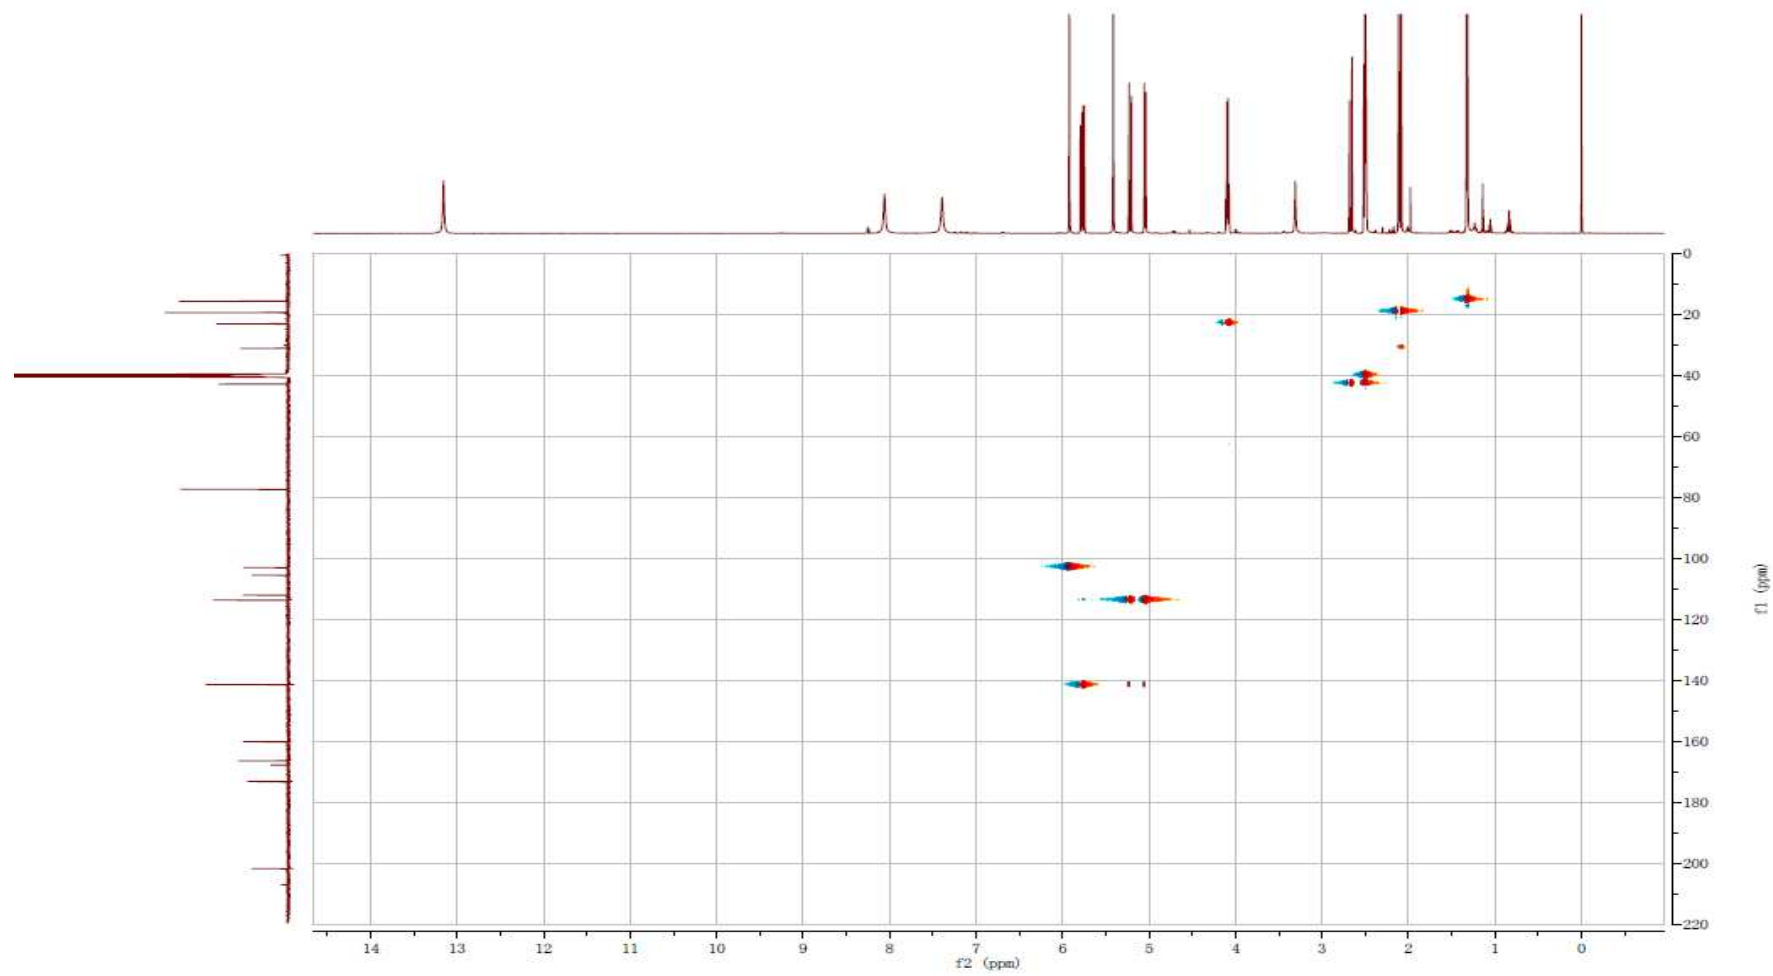

**Figure S4.**  $^1\text{H}$ - $^1\text{H}$  COSY spectrum of Compound **1** (DMSO- $d_6$ , 600MHz).

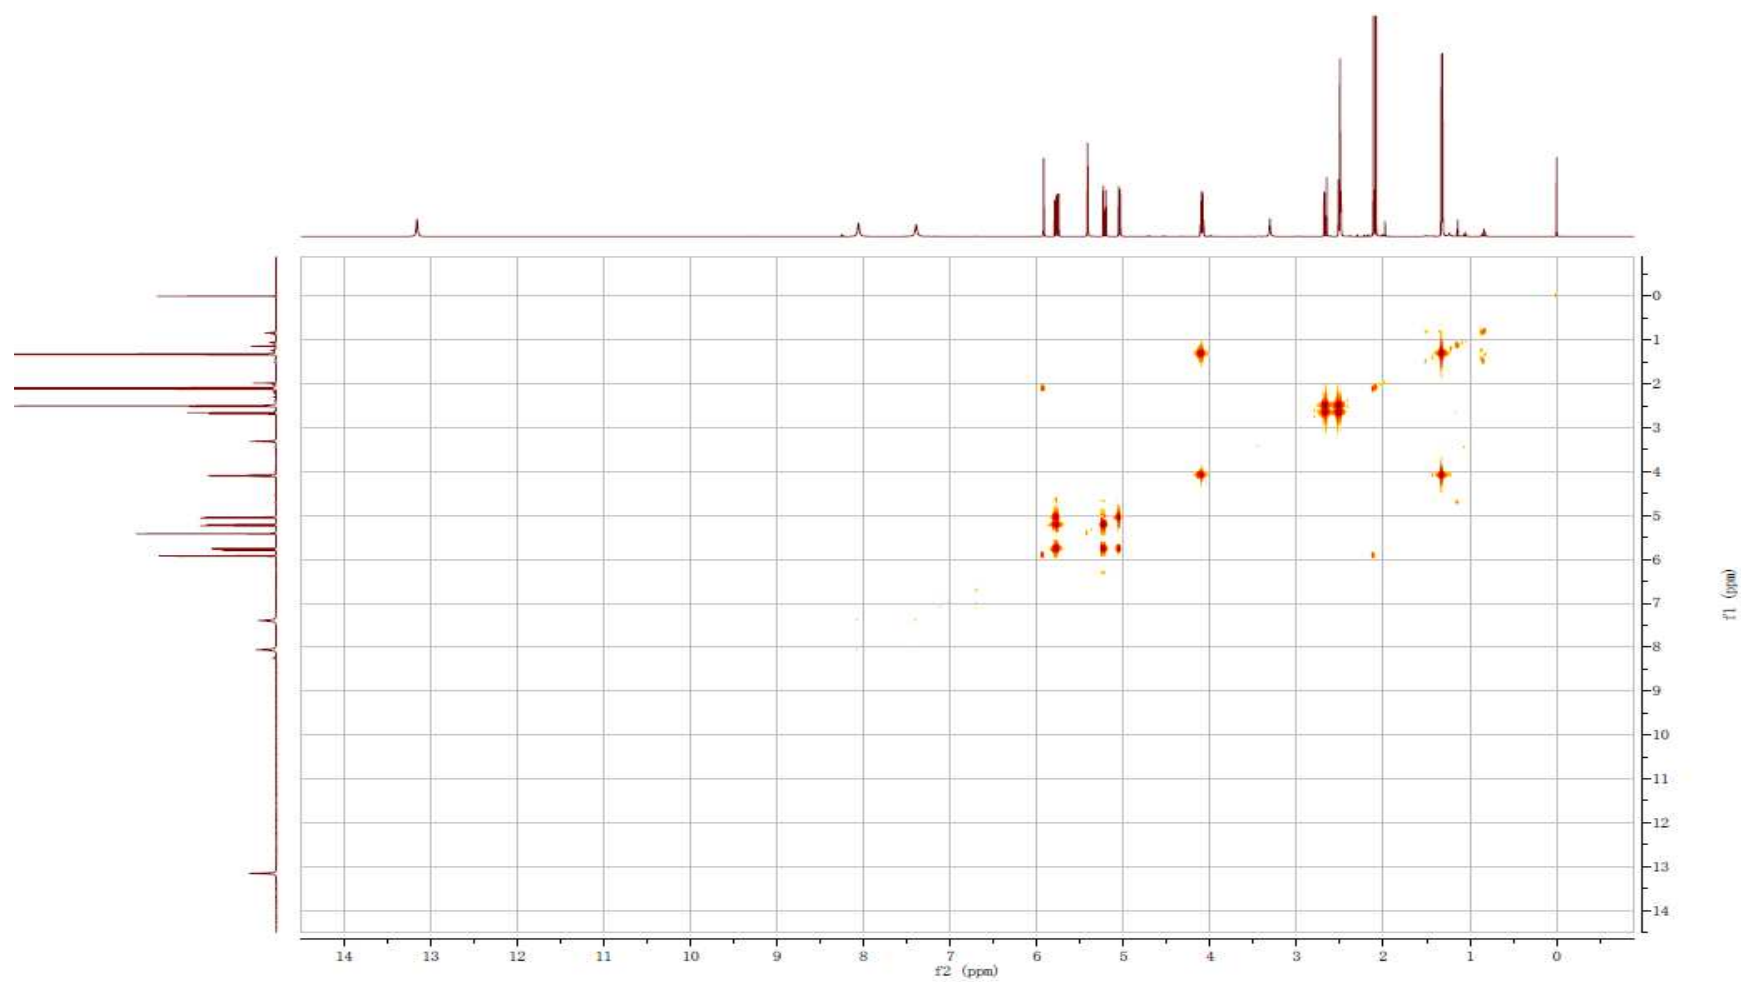

Figure S5. HMBC spectrum of Compound 1 (DMSO-*d*<sub>6</sub>, 600MHz).

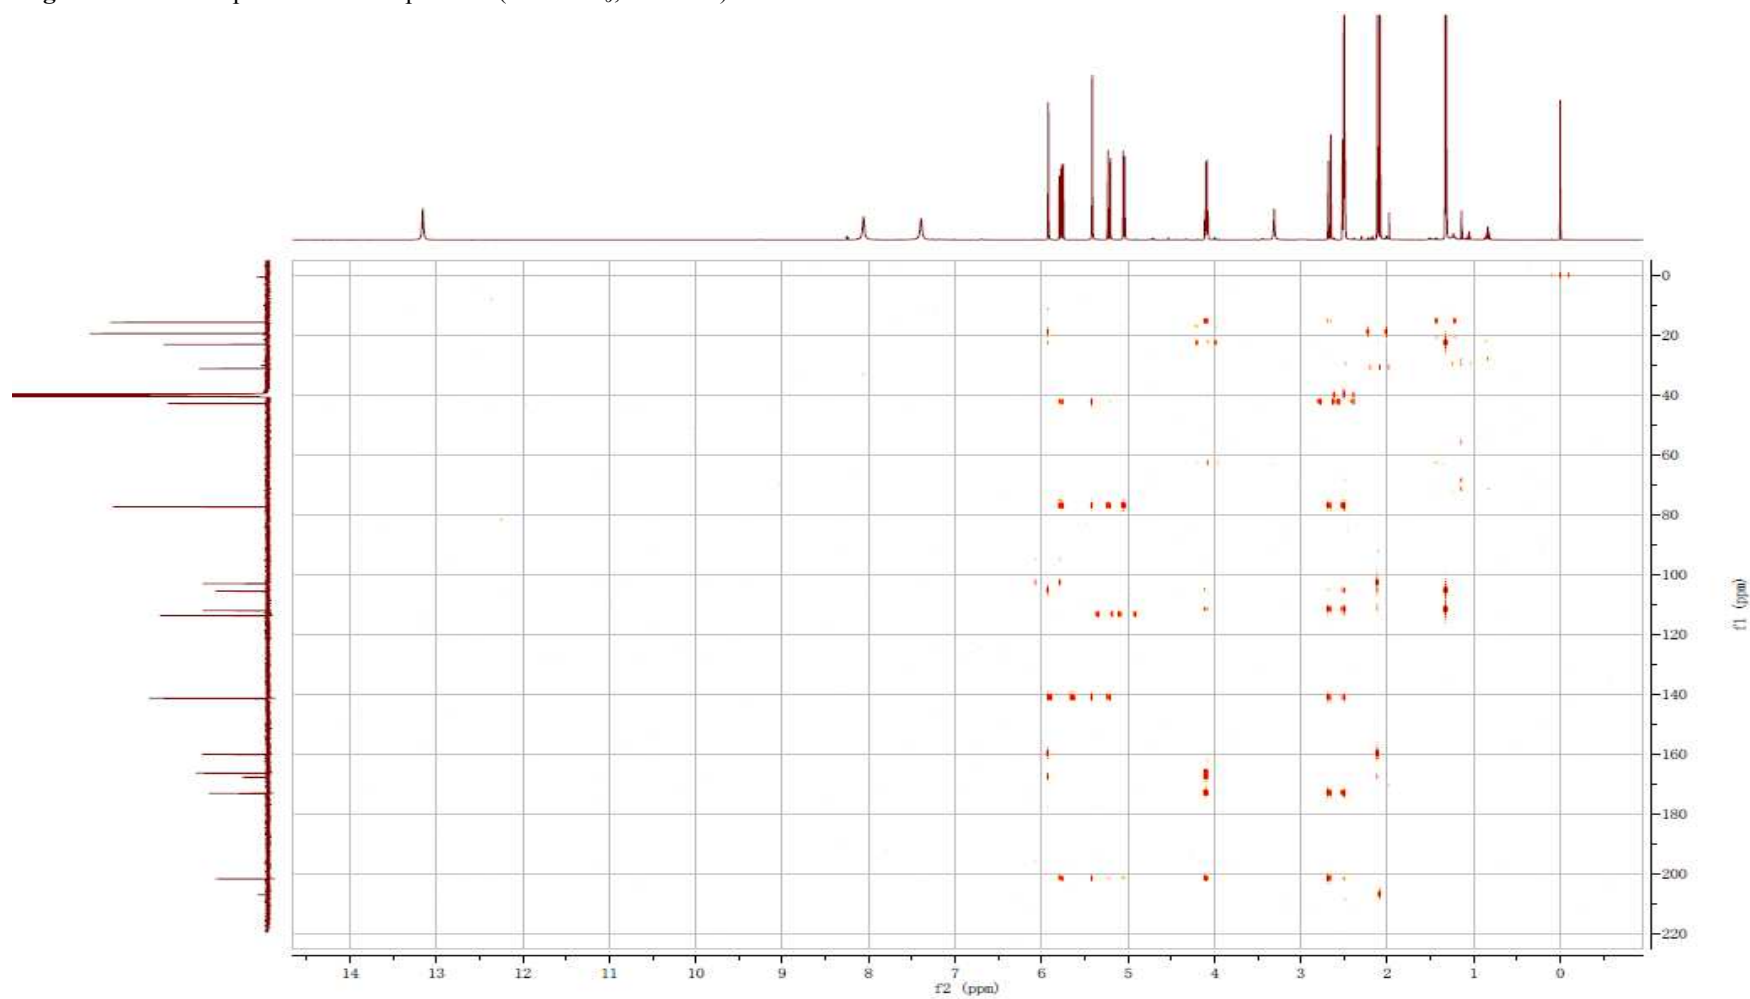

**Figure S6.** NOESY spectrum of Compound **1** (DMSO-*d*<sub>6</sub>, 600MHz).

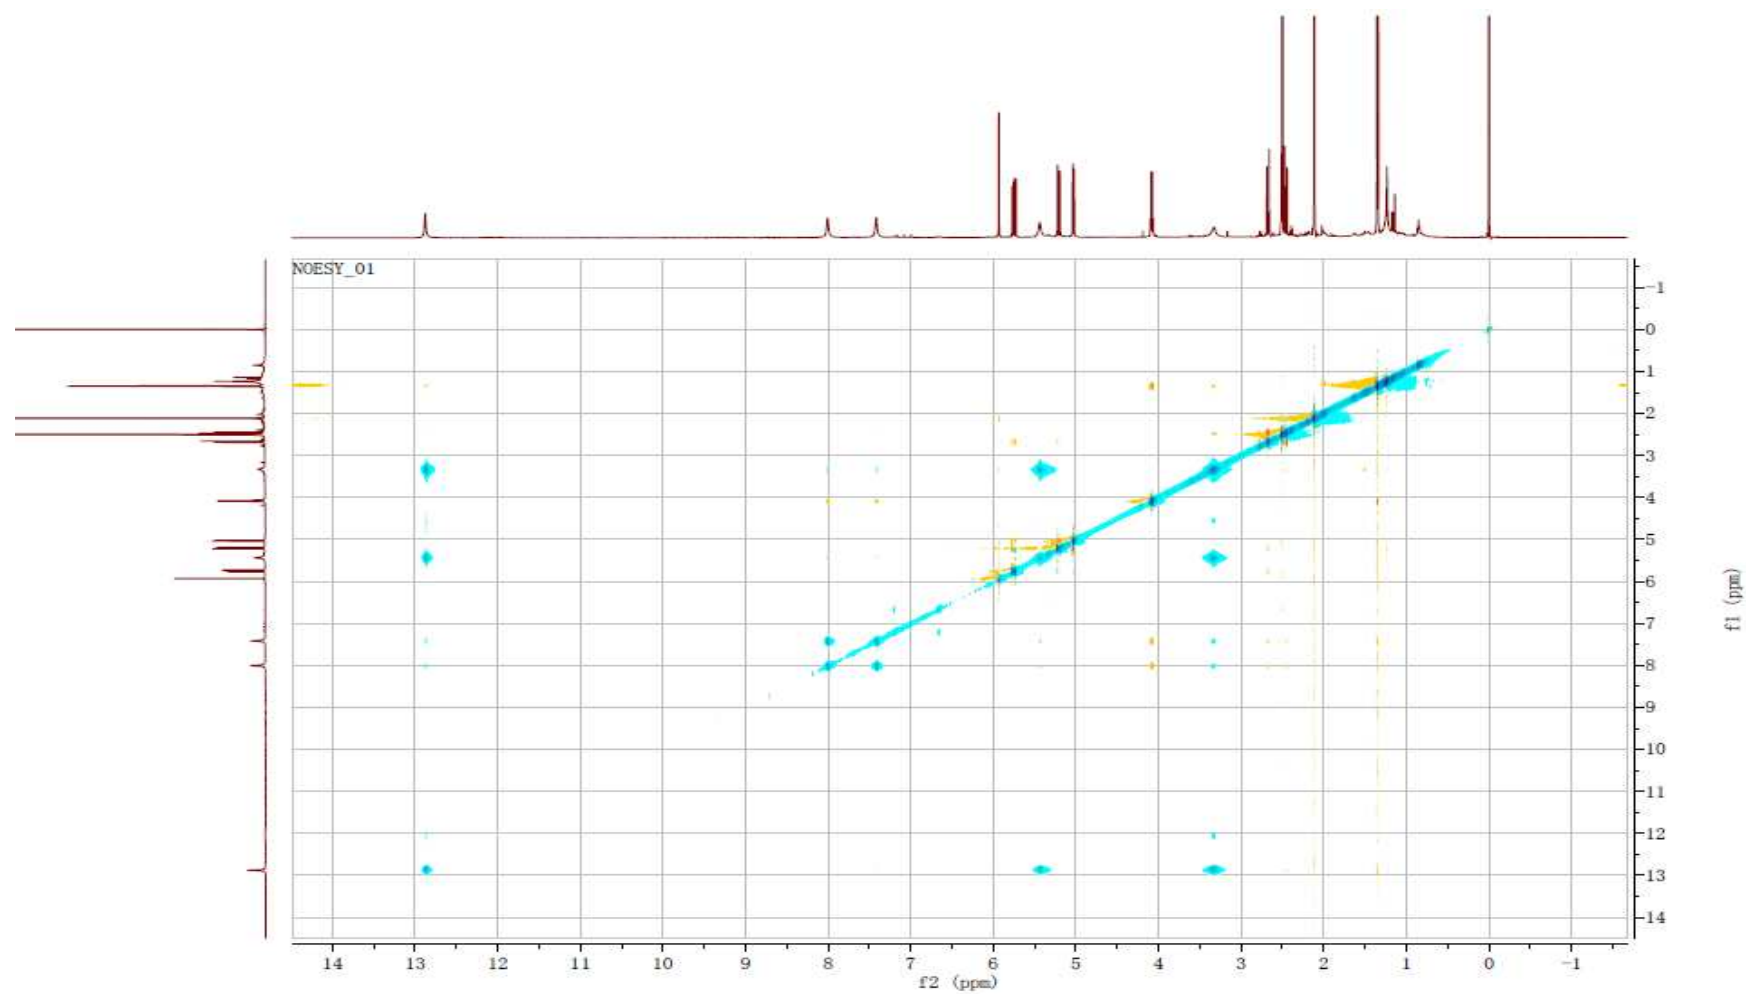

Figure S7. HR-ESI-MS spectrum of compound 1.

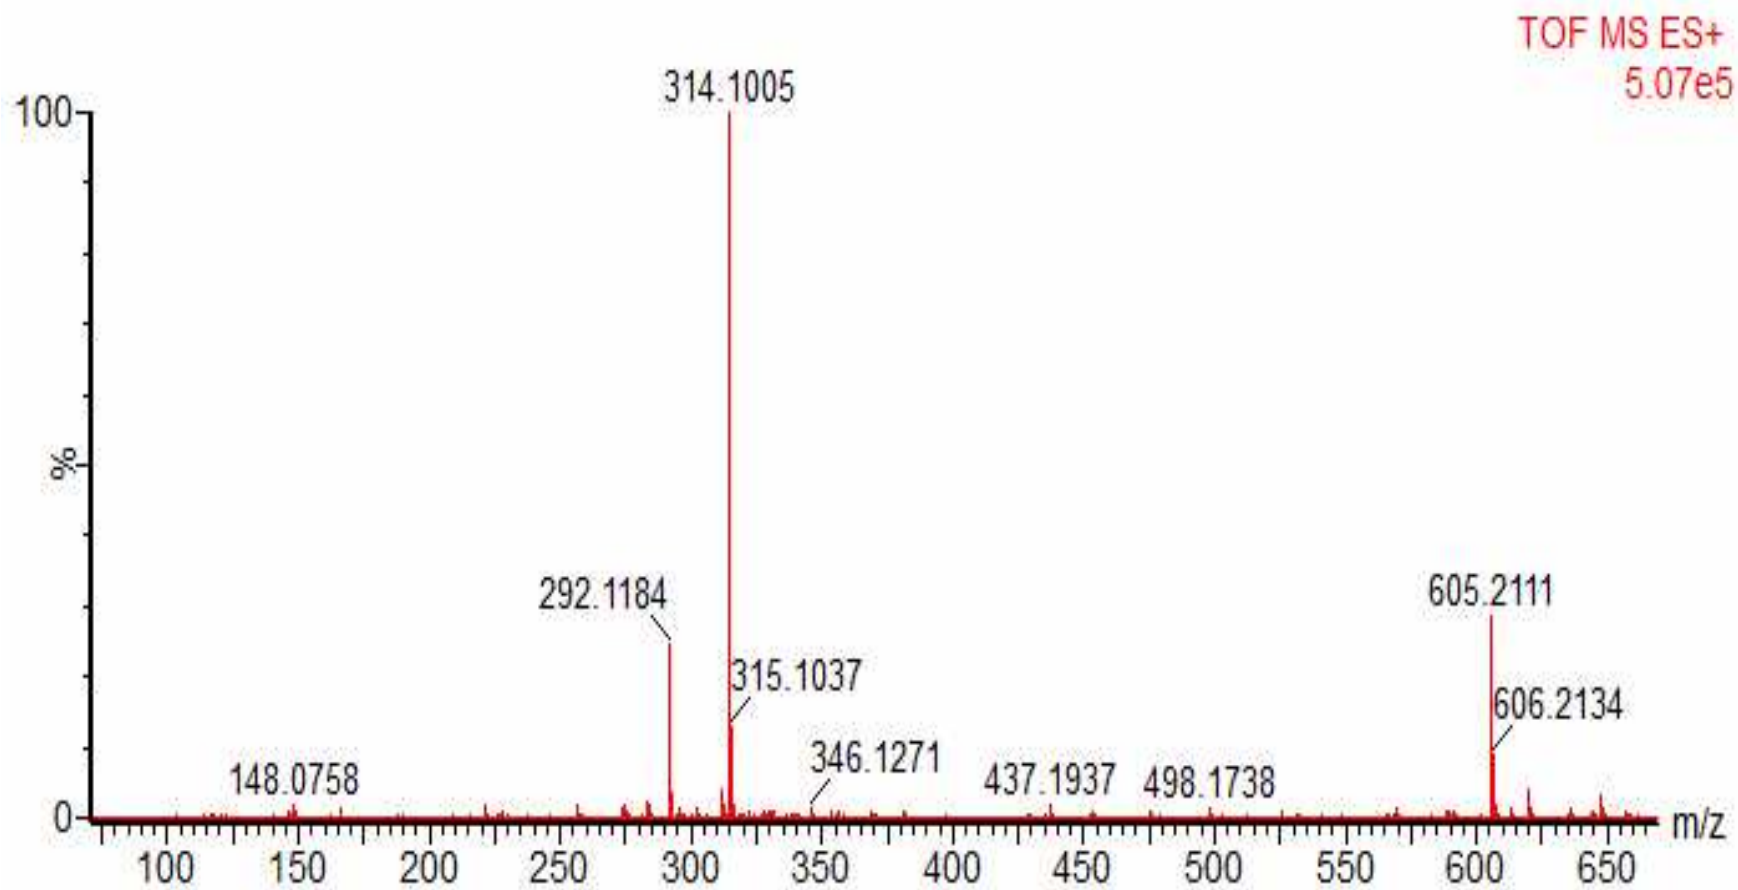



Figure S8. CD spectrum of compound 1

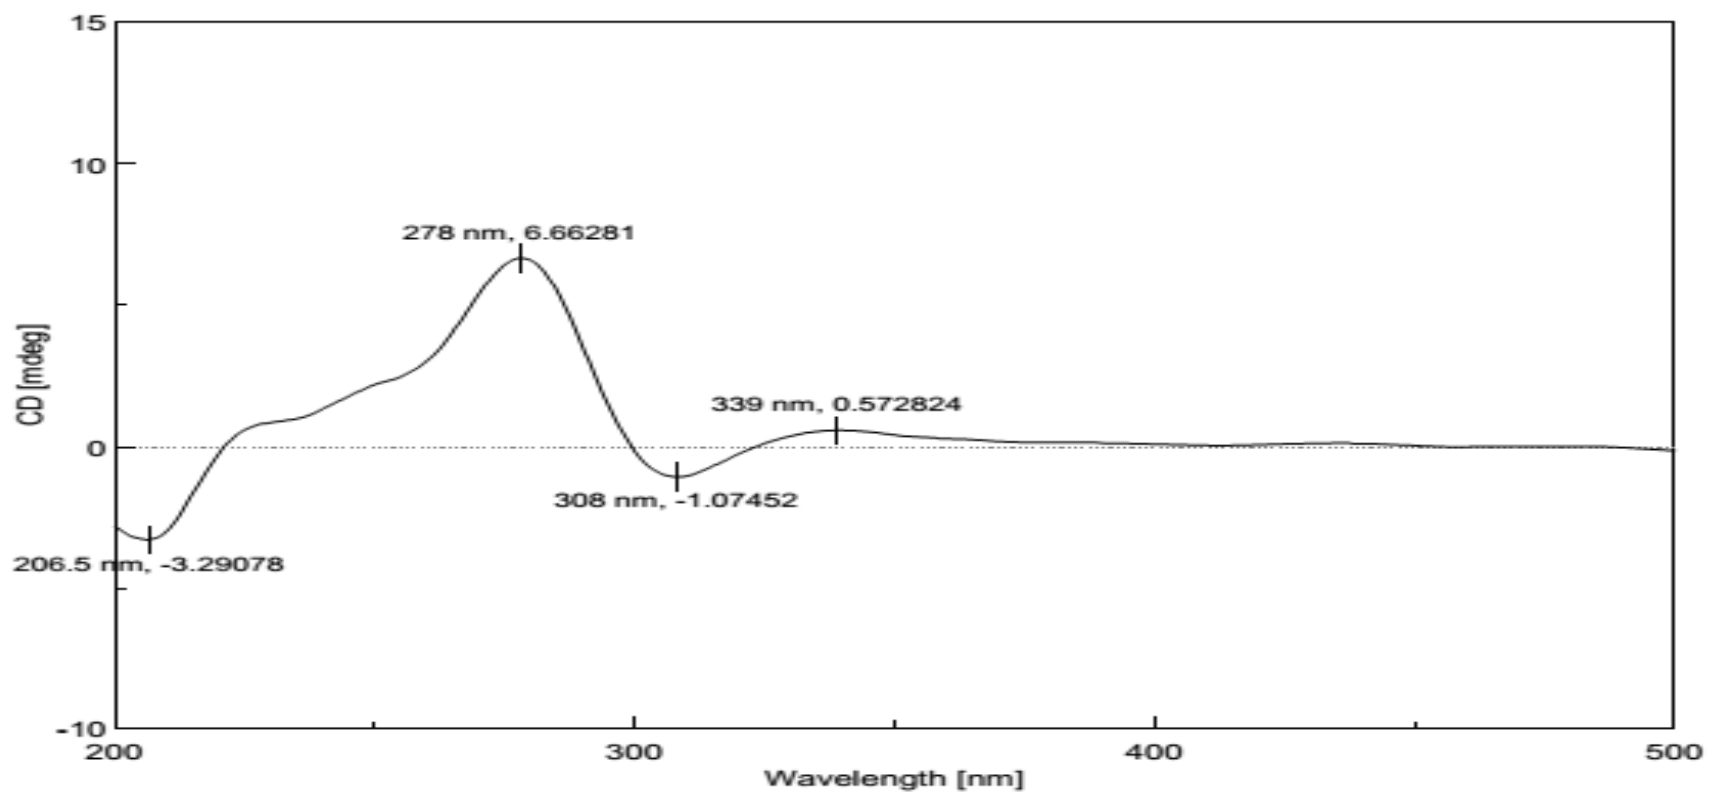

Supplement: Supplementary file 1 [file 8561095]
